# Supplementary material
Source: PubMed Central journal article supplement (PMC3917506)

### Actin

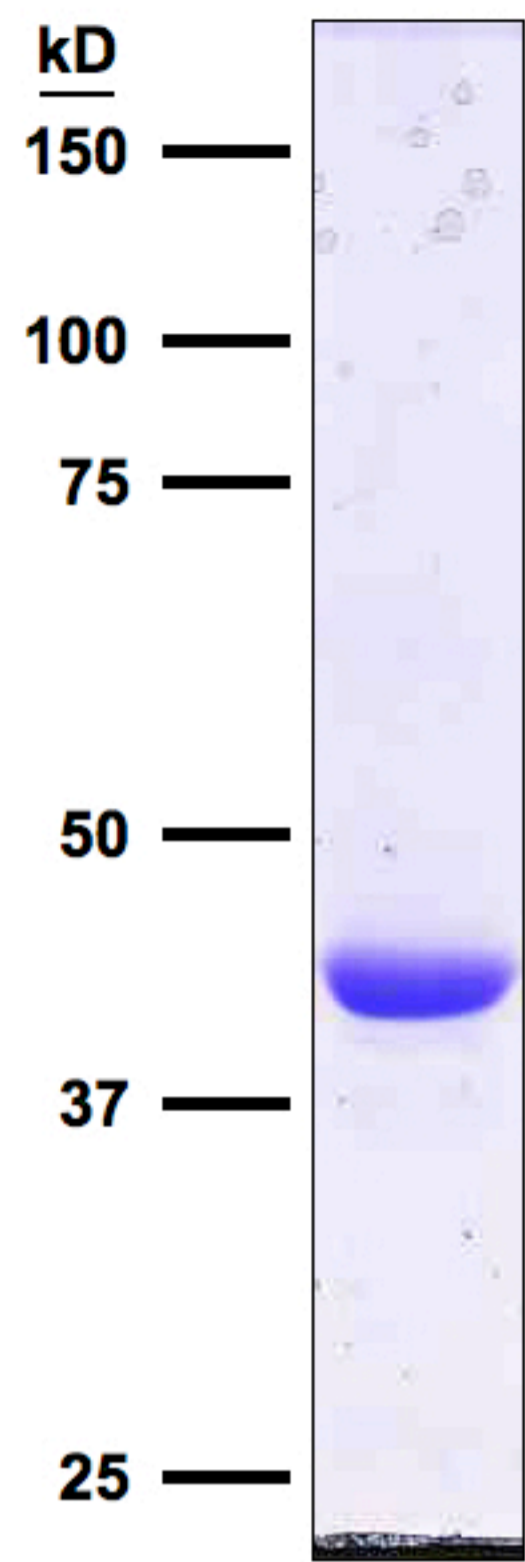

### Arp2/3 complex

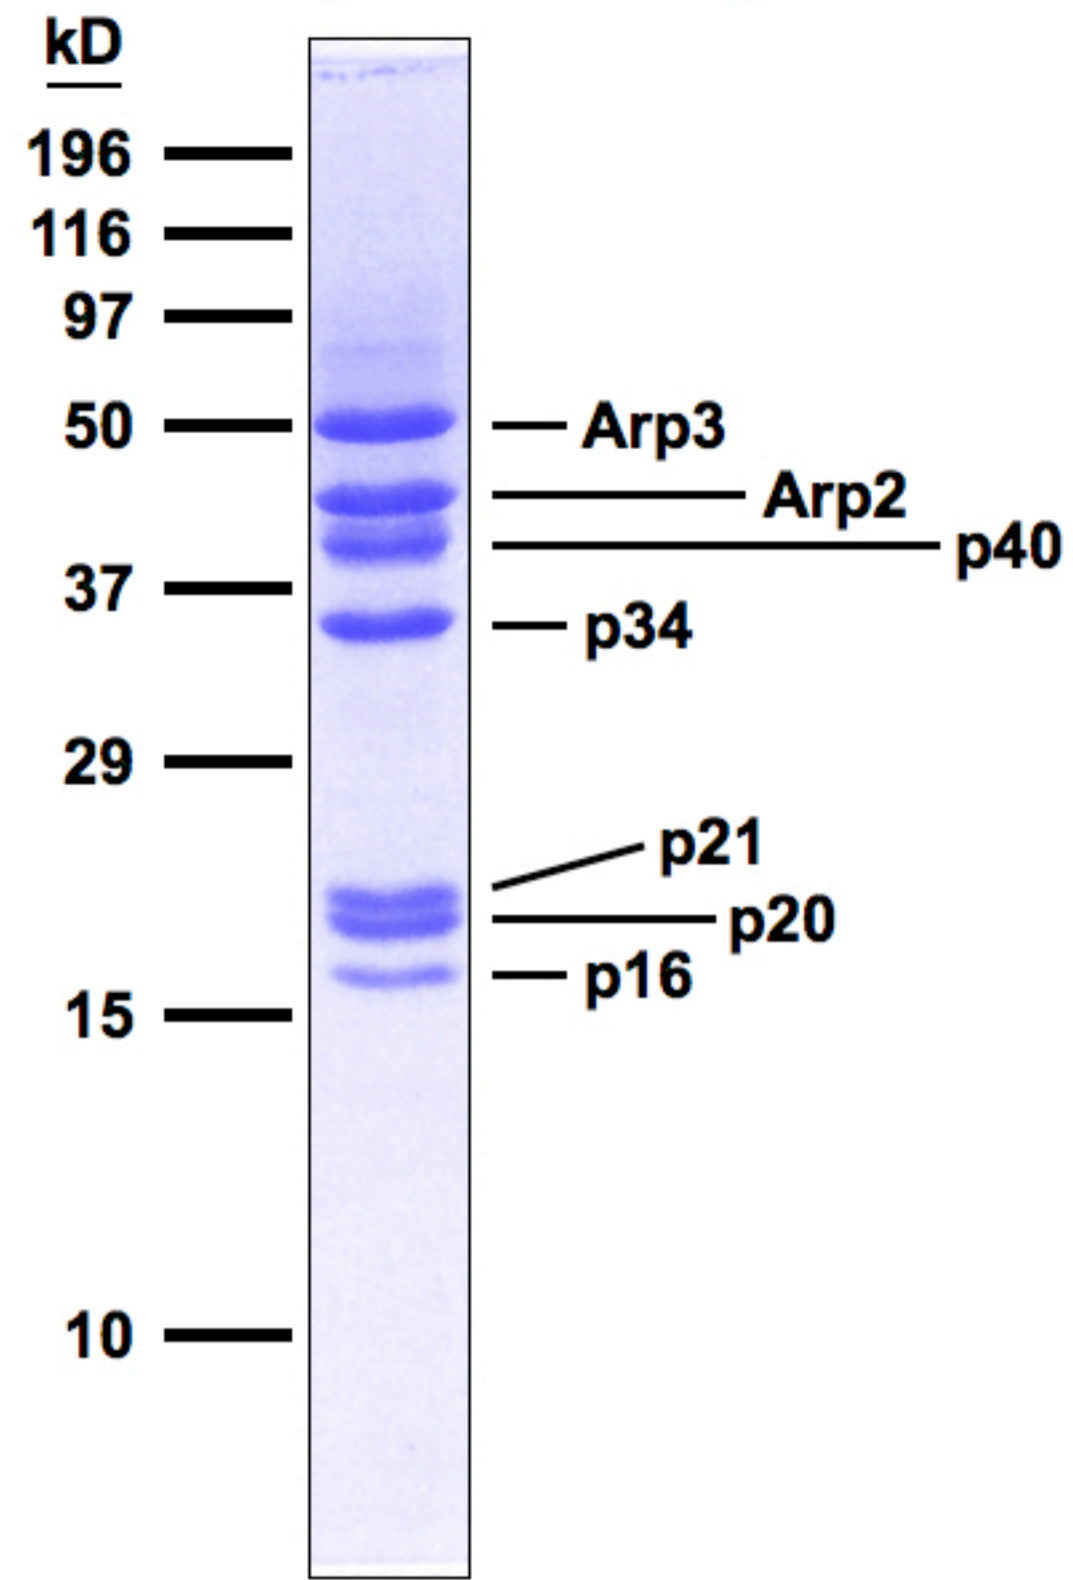

### Cdc42

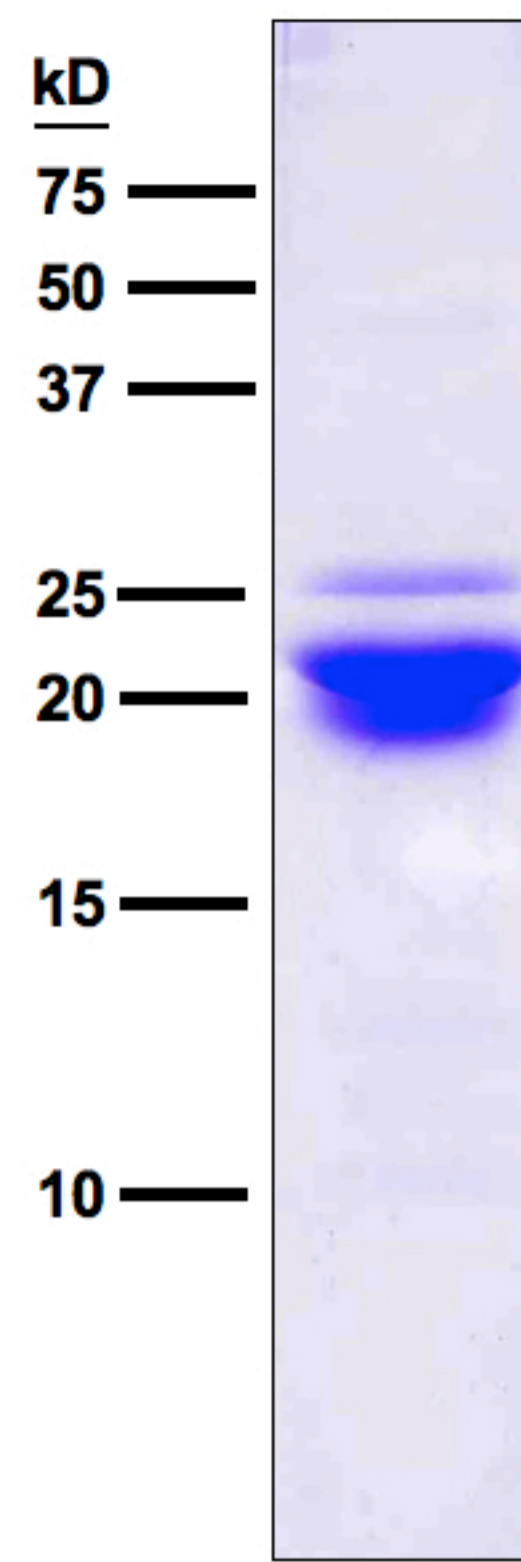

### GST-Cdc42

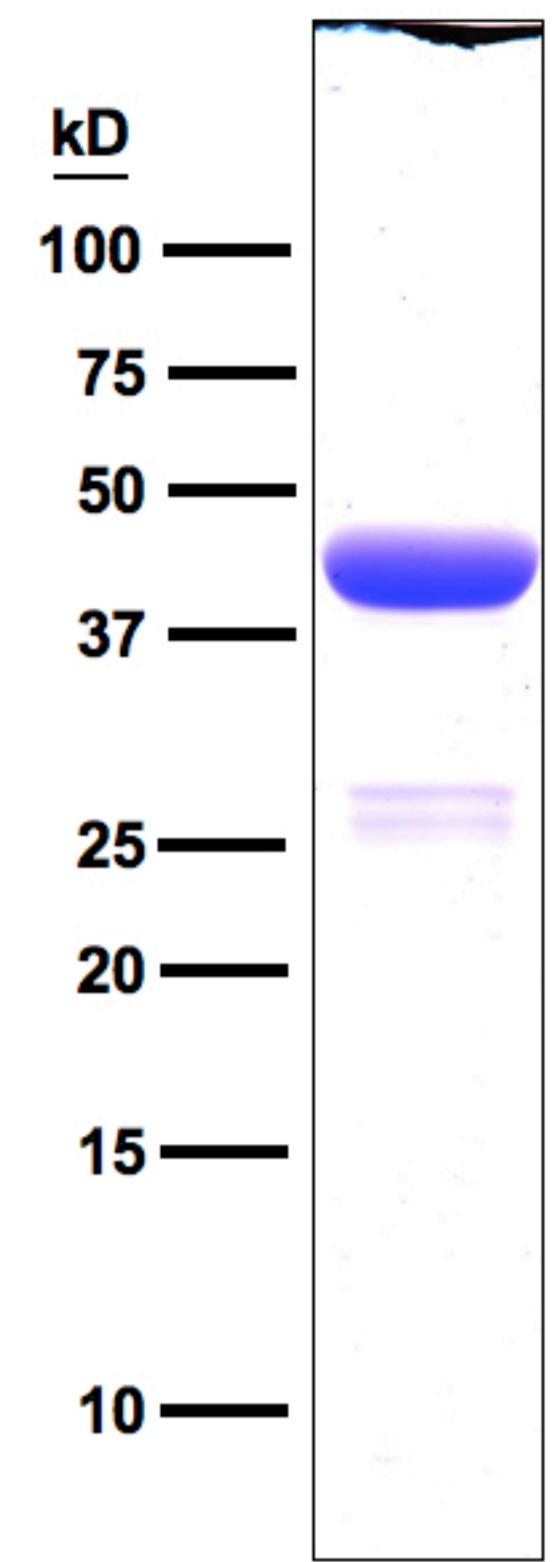

### IQGAP1

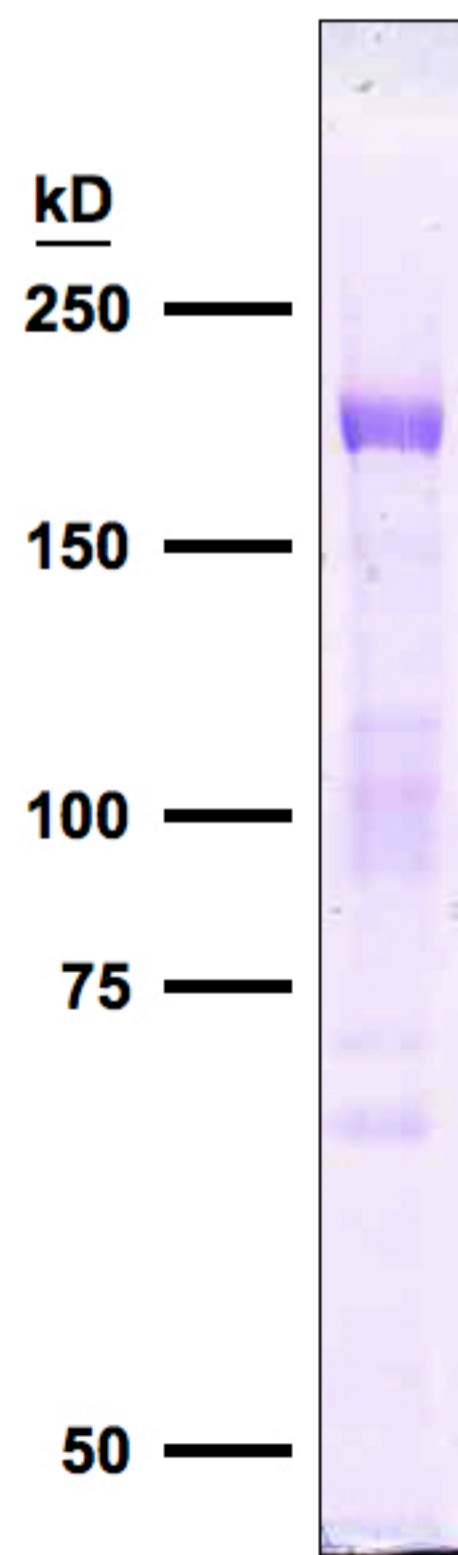

### N-WASP

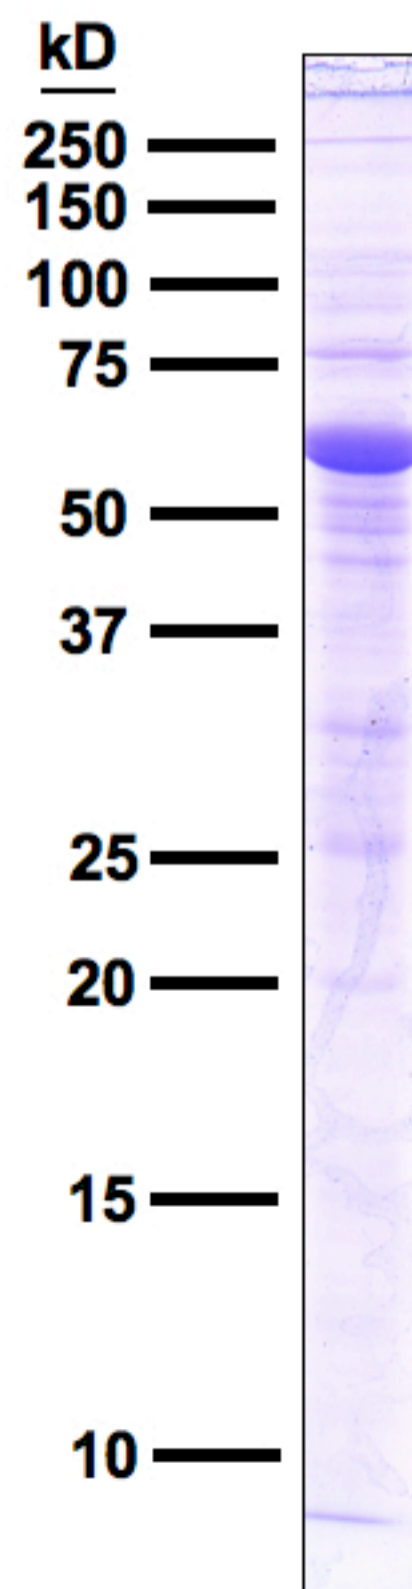

### Rac1

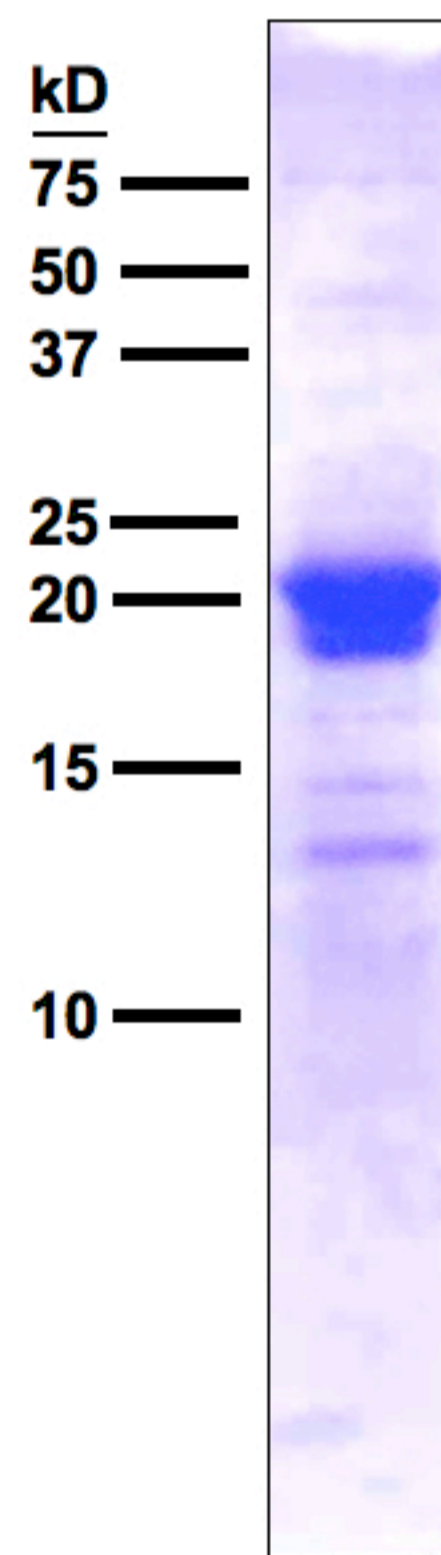

### GST-Rac1

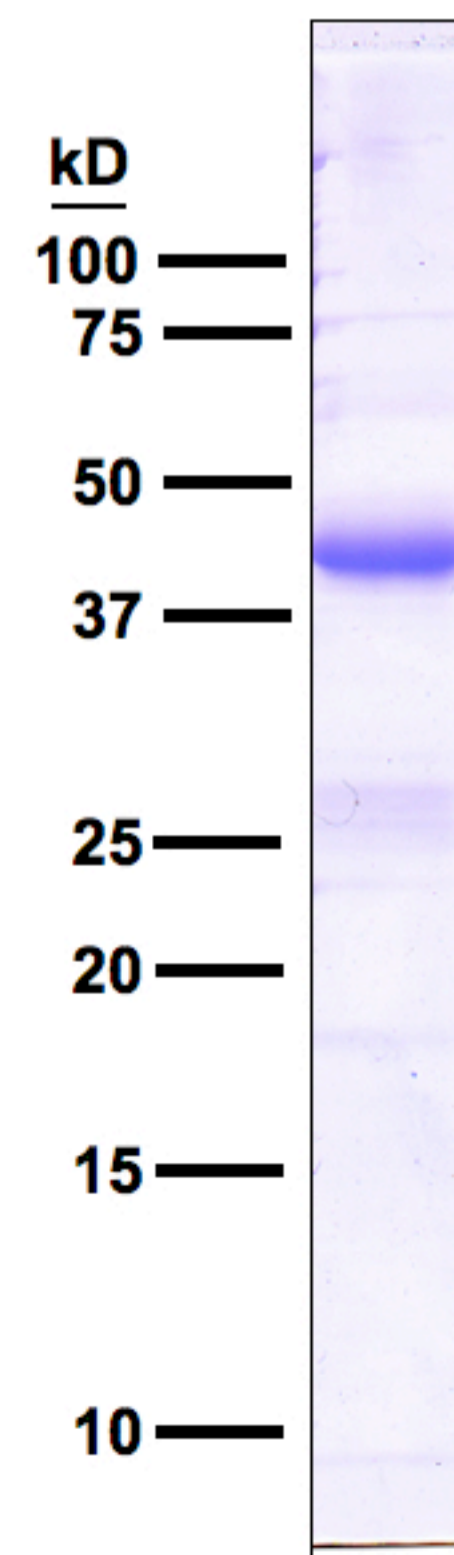

# *anti-IQGAP1 Pulldowns*

**GST-Cdc42**  
**GTP $\gamma$ S**

**GST-Rac1**  
**GTP $\gamma$ S**

**GST**  
**GTP $\gamma$ S**

total

bound

total

bound

total

bound

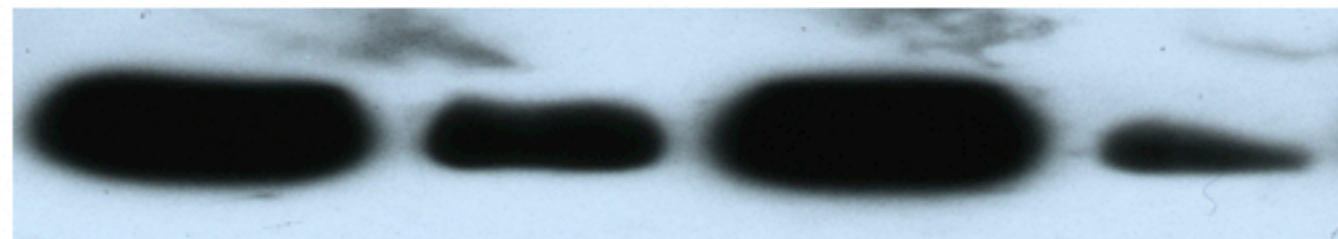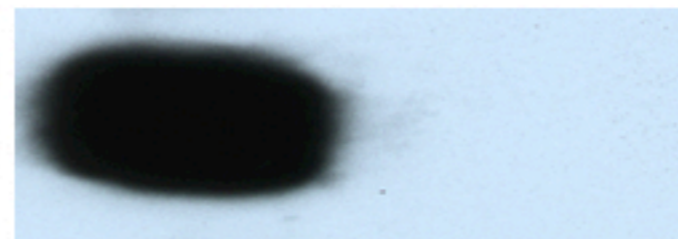

**anti-GST**

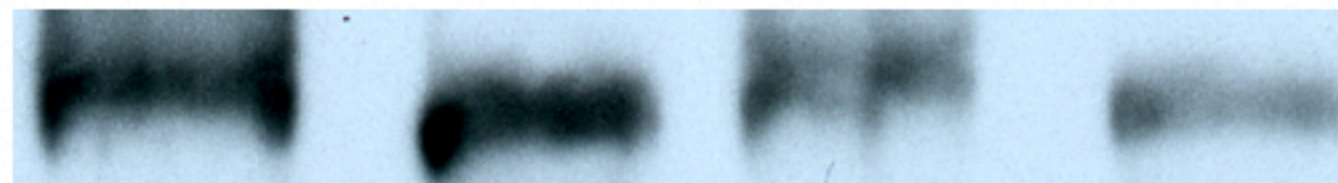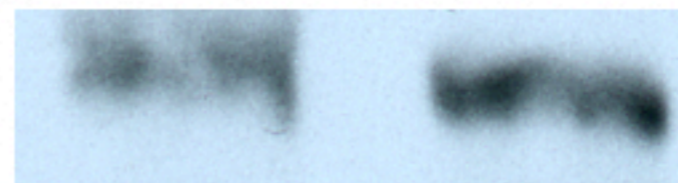

**anti-IQGAP1**



**A**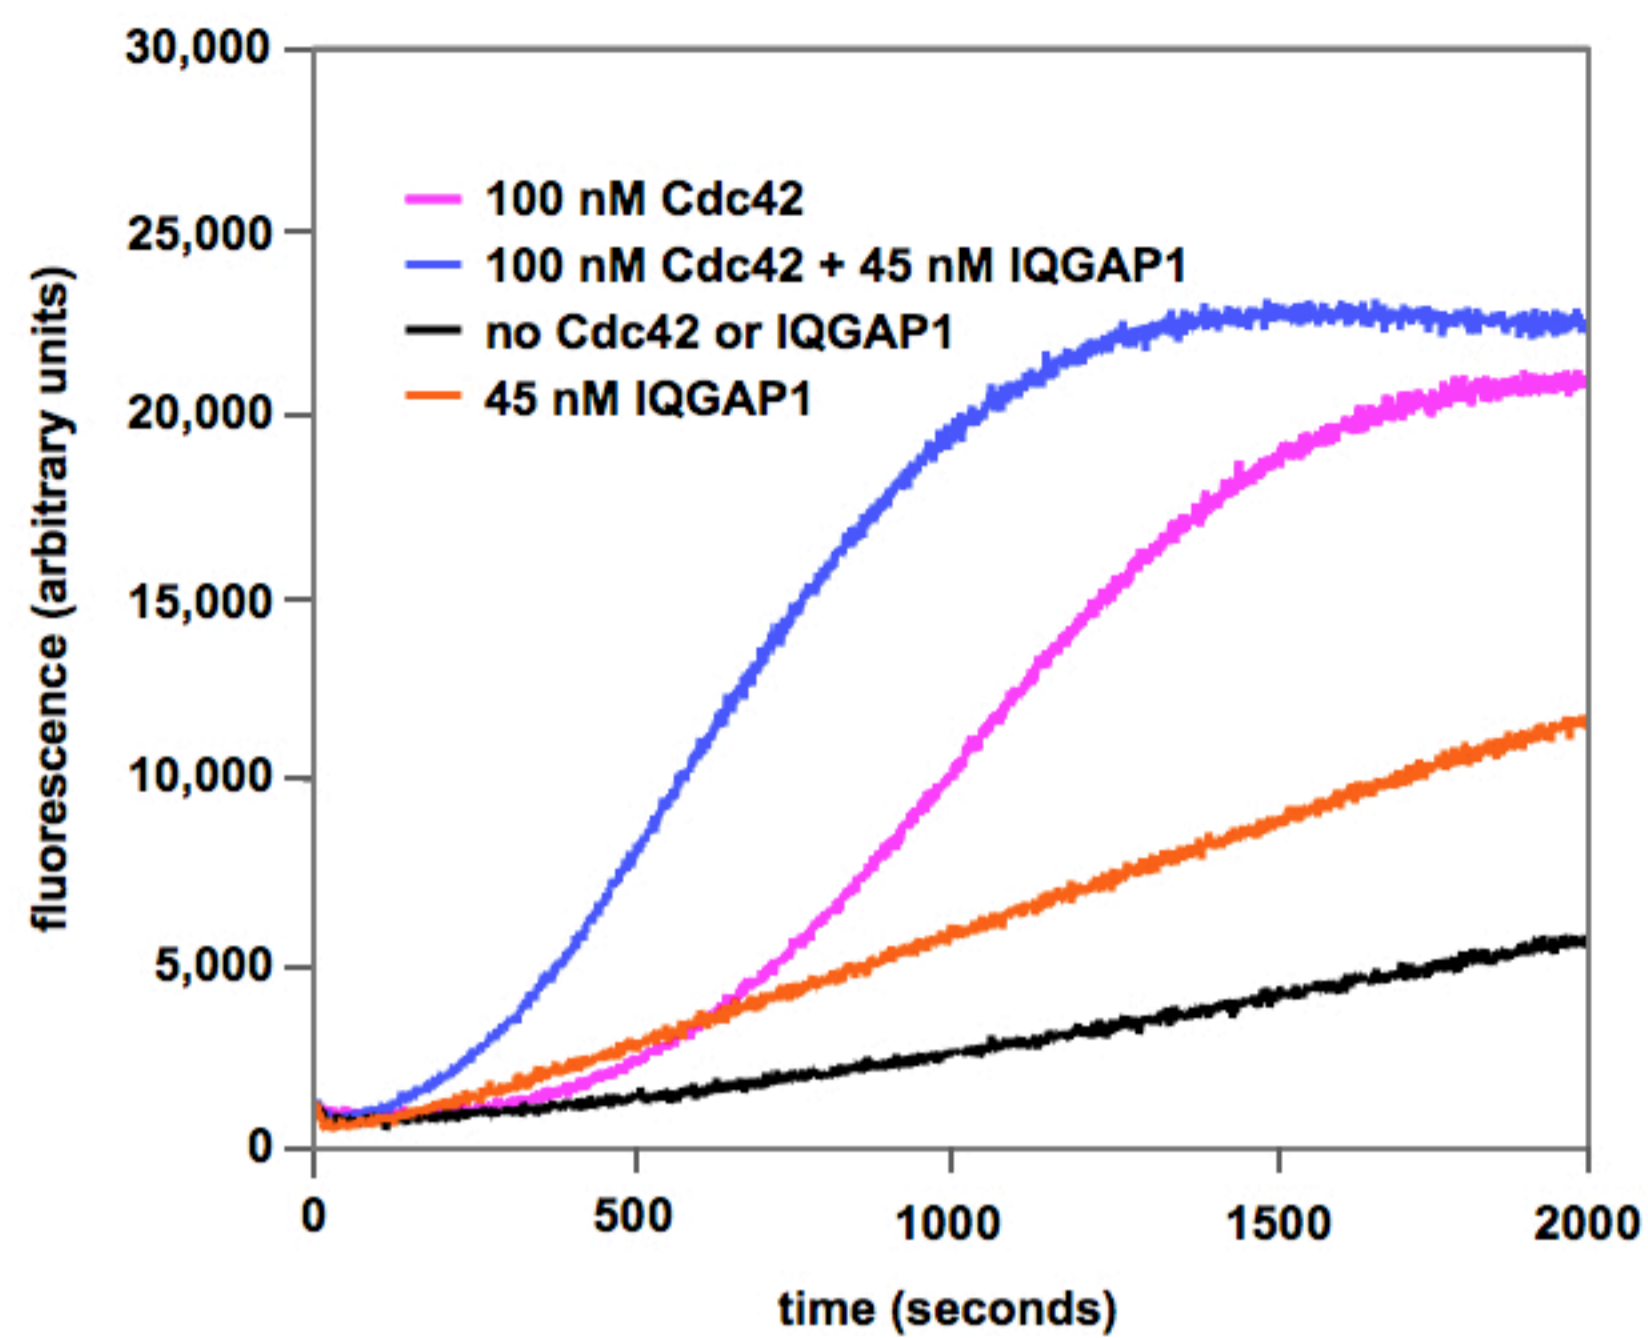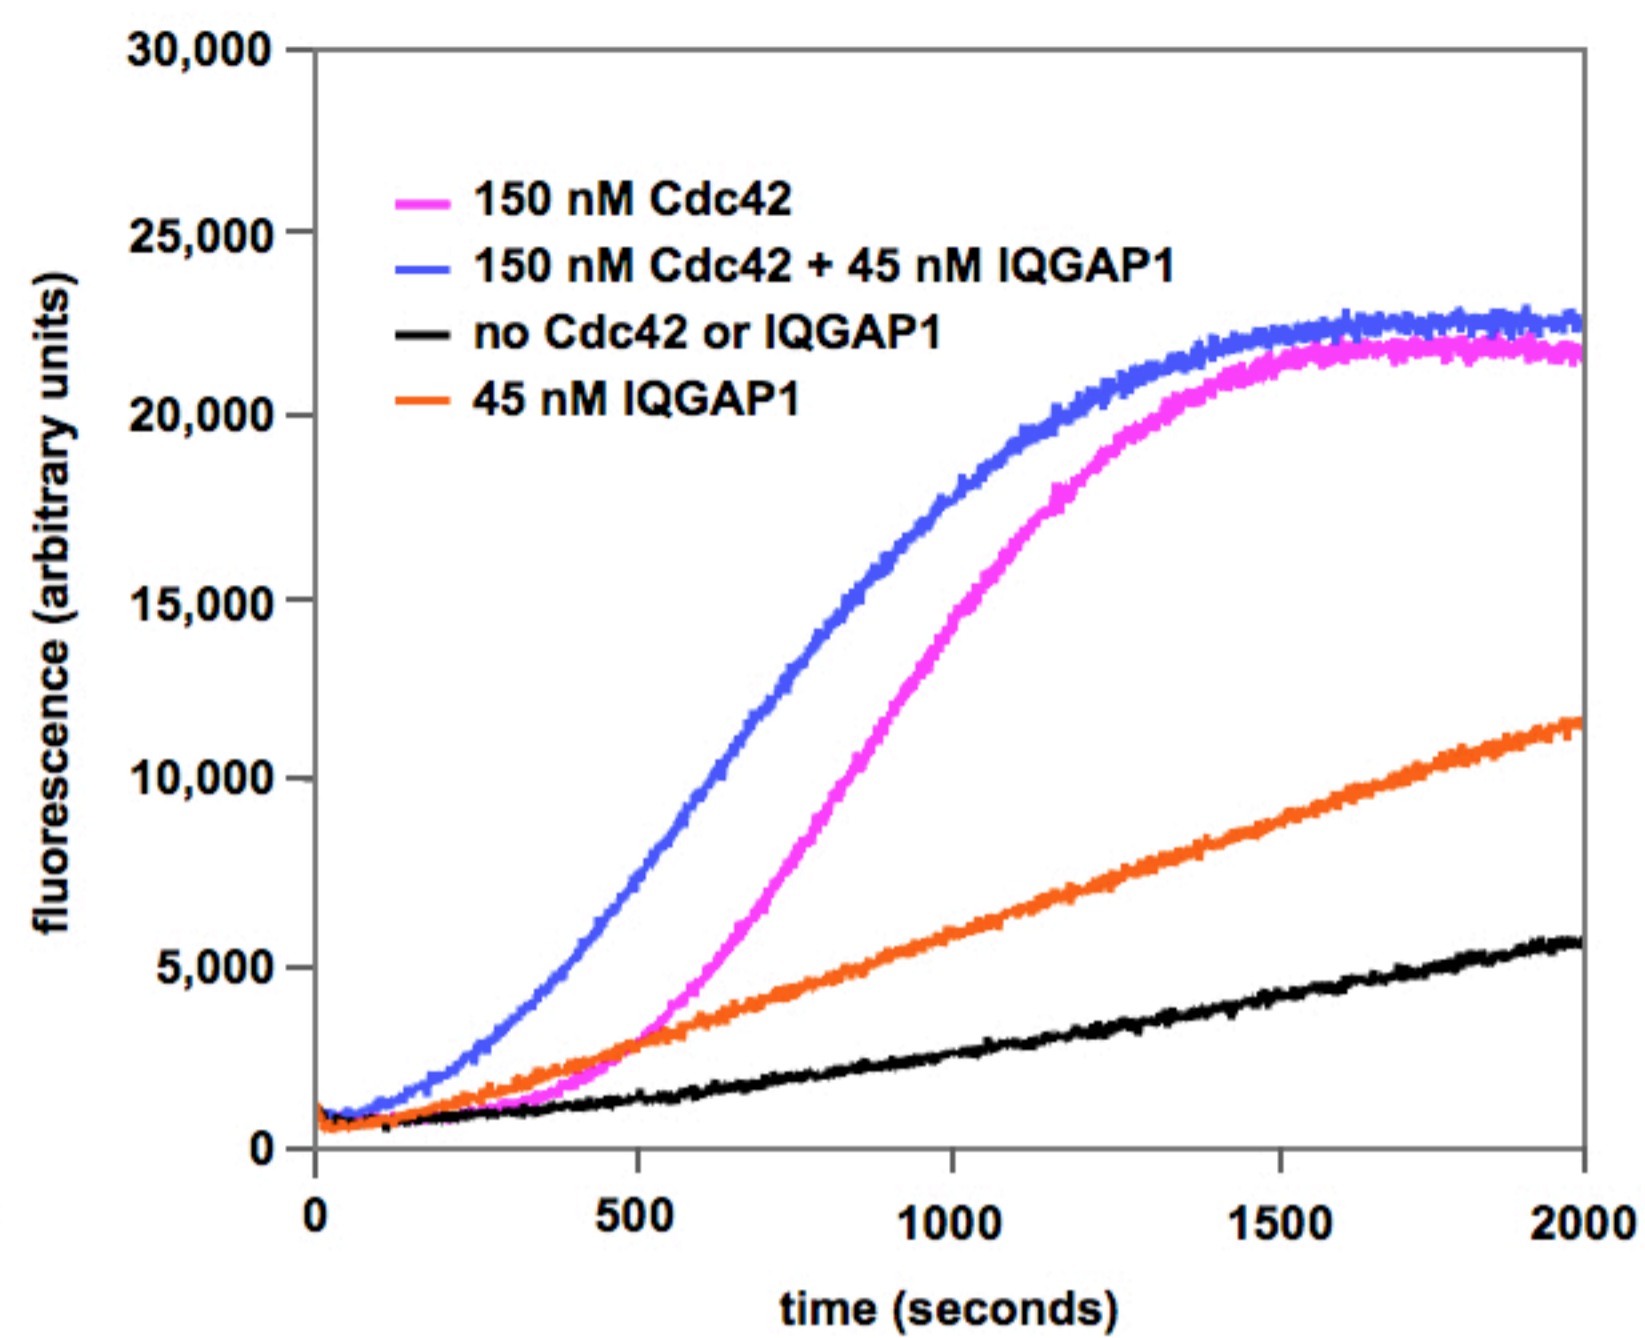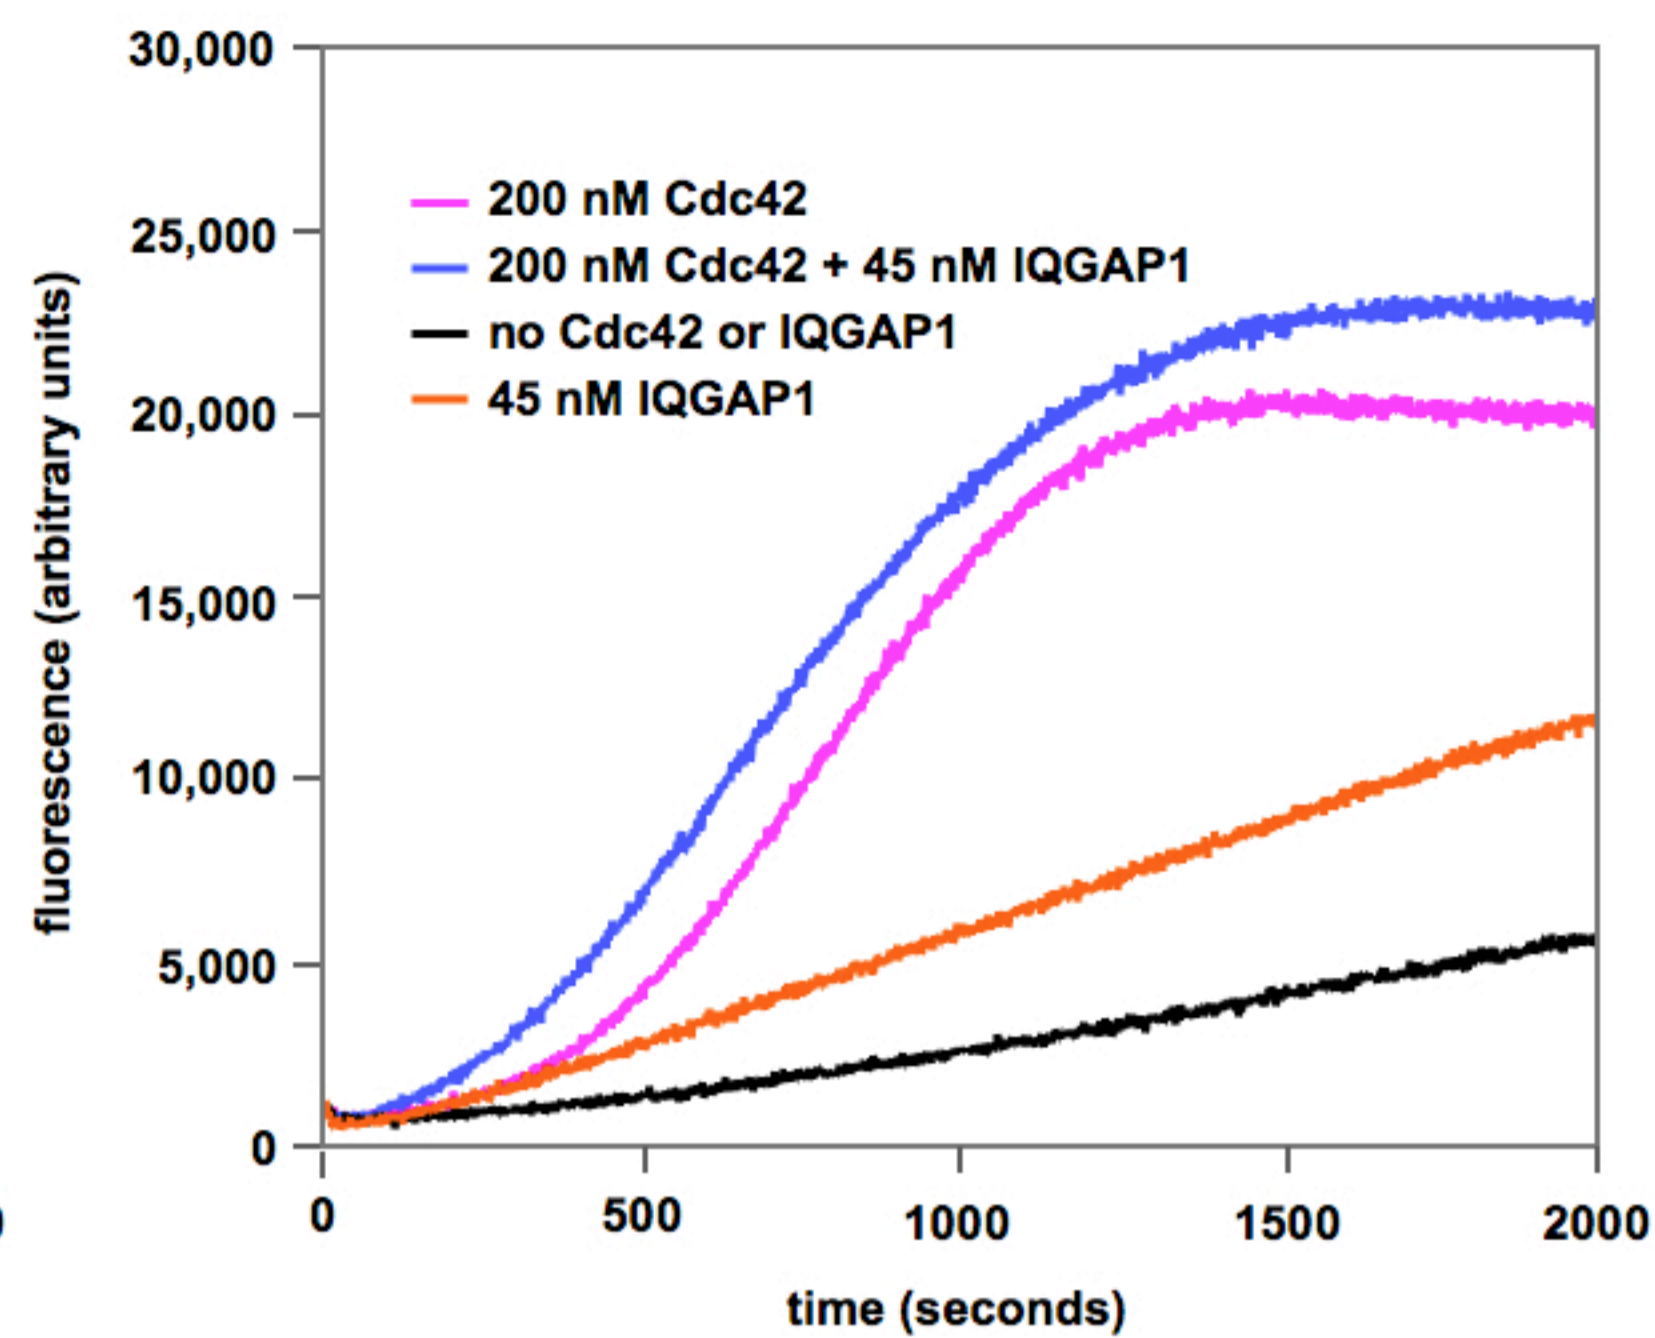**B**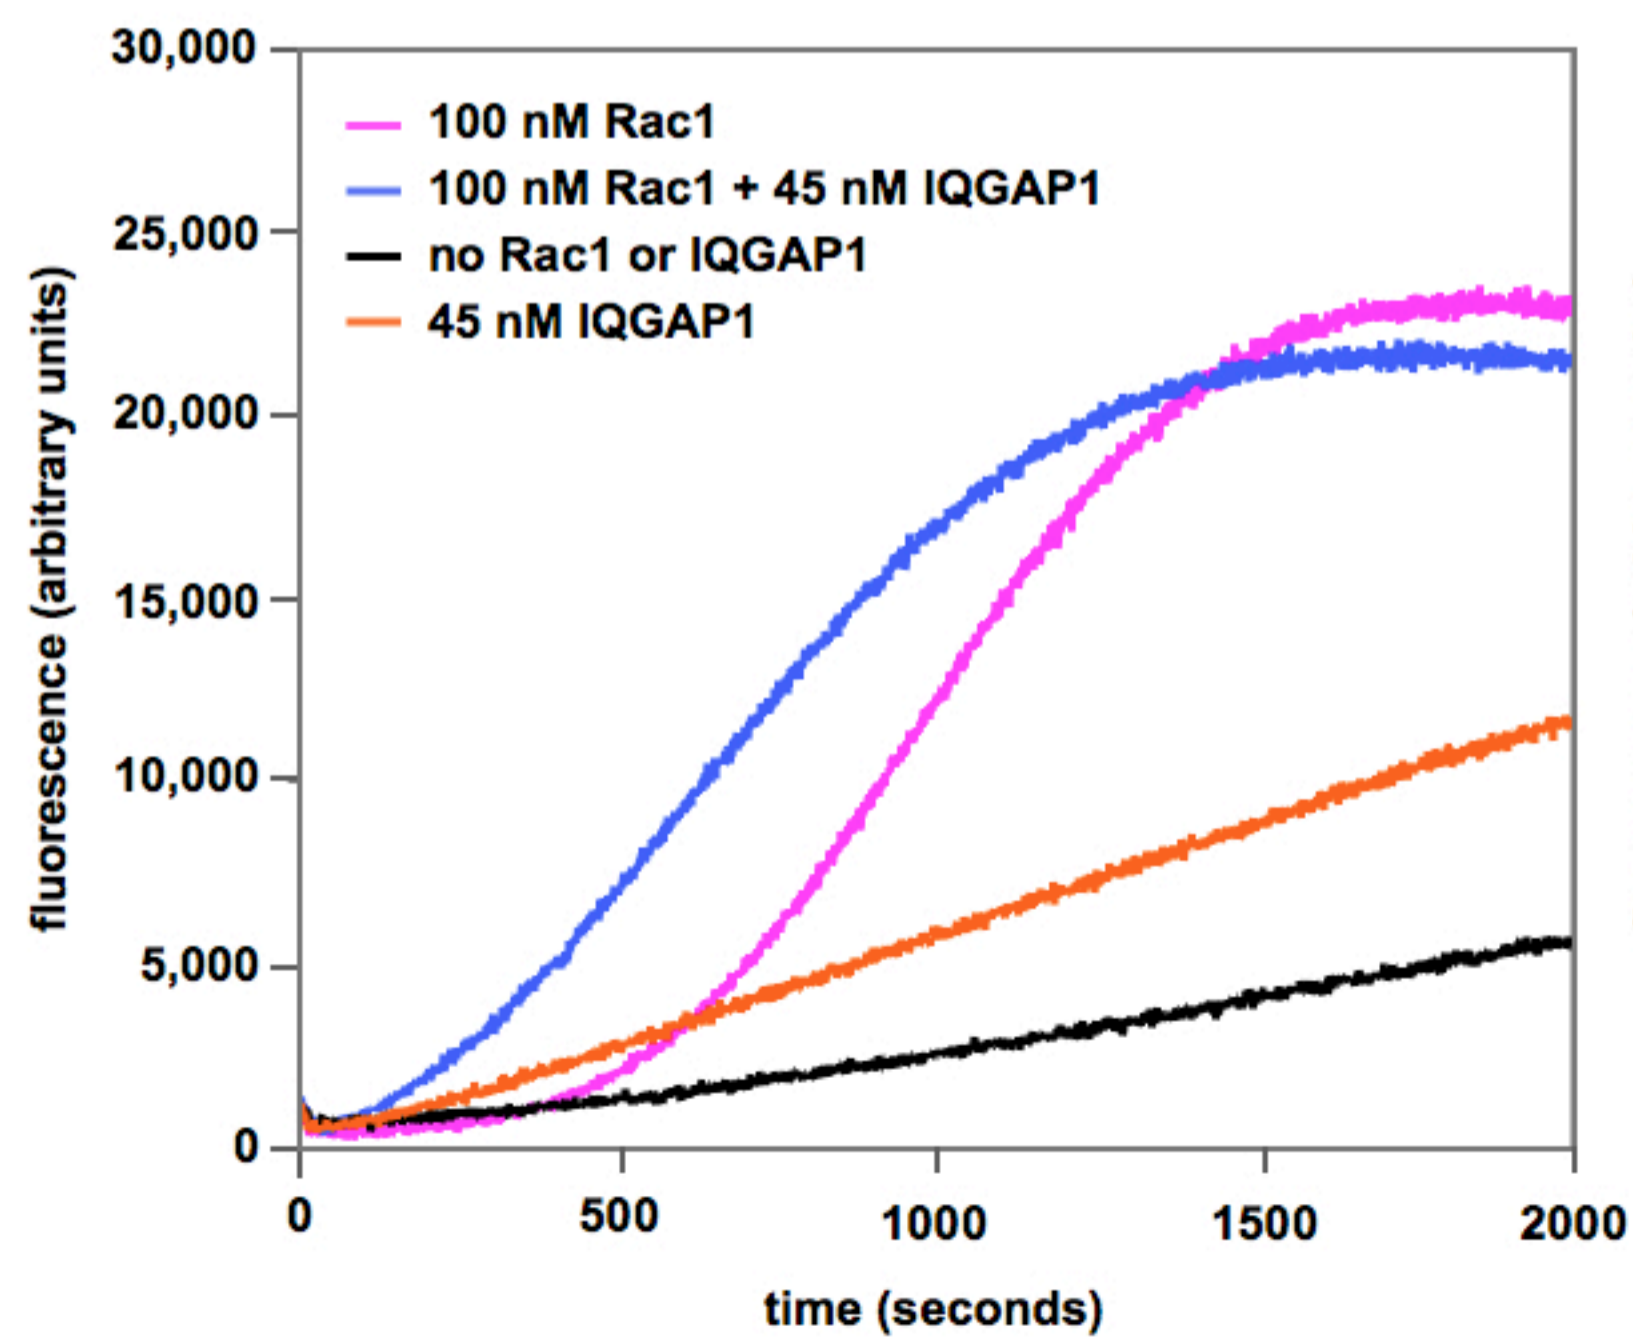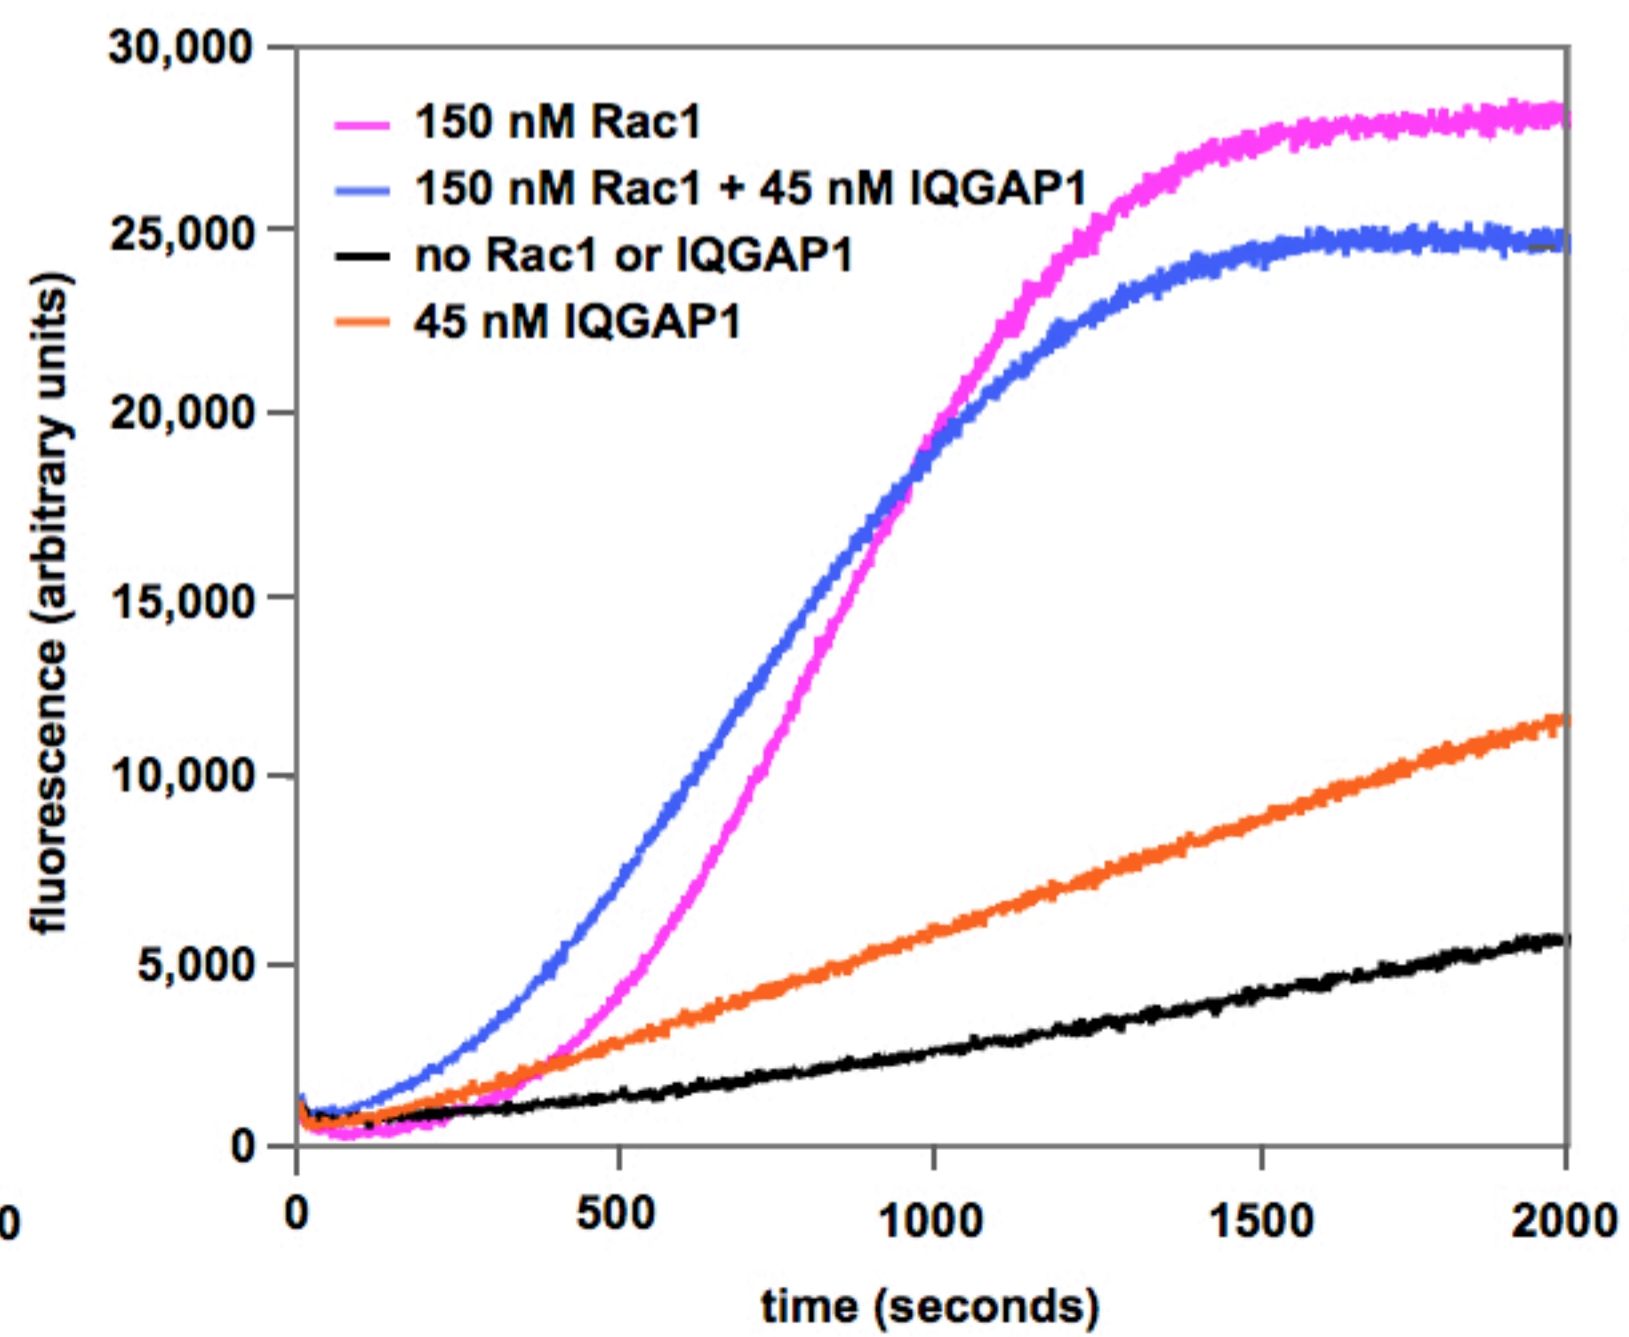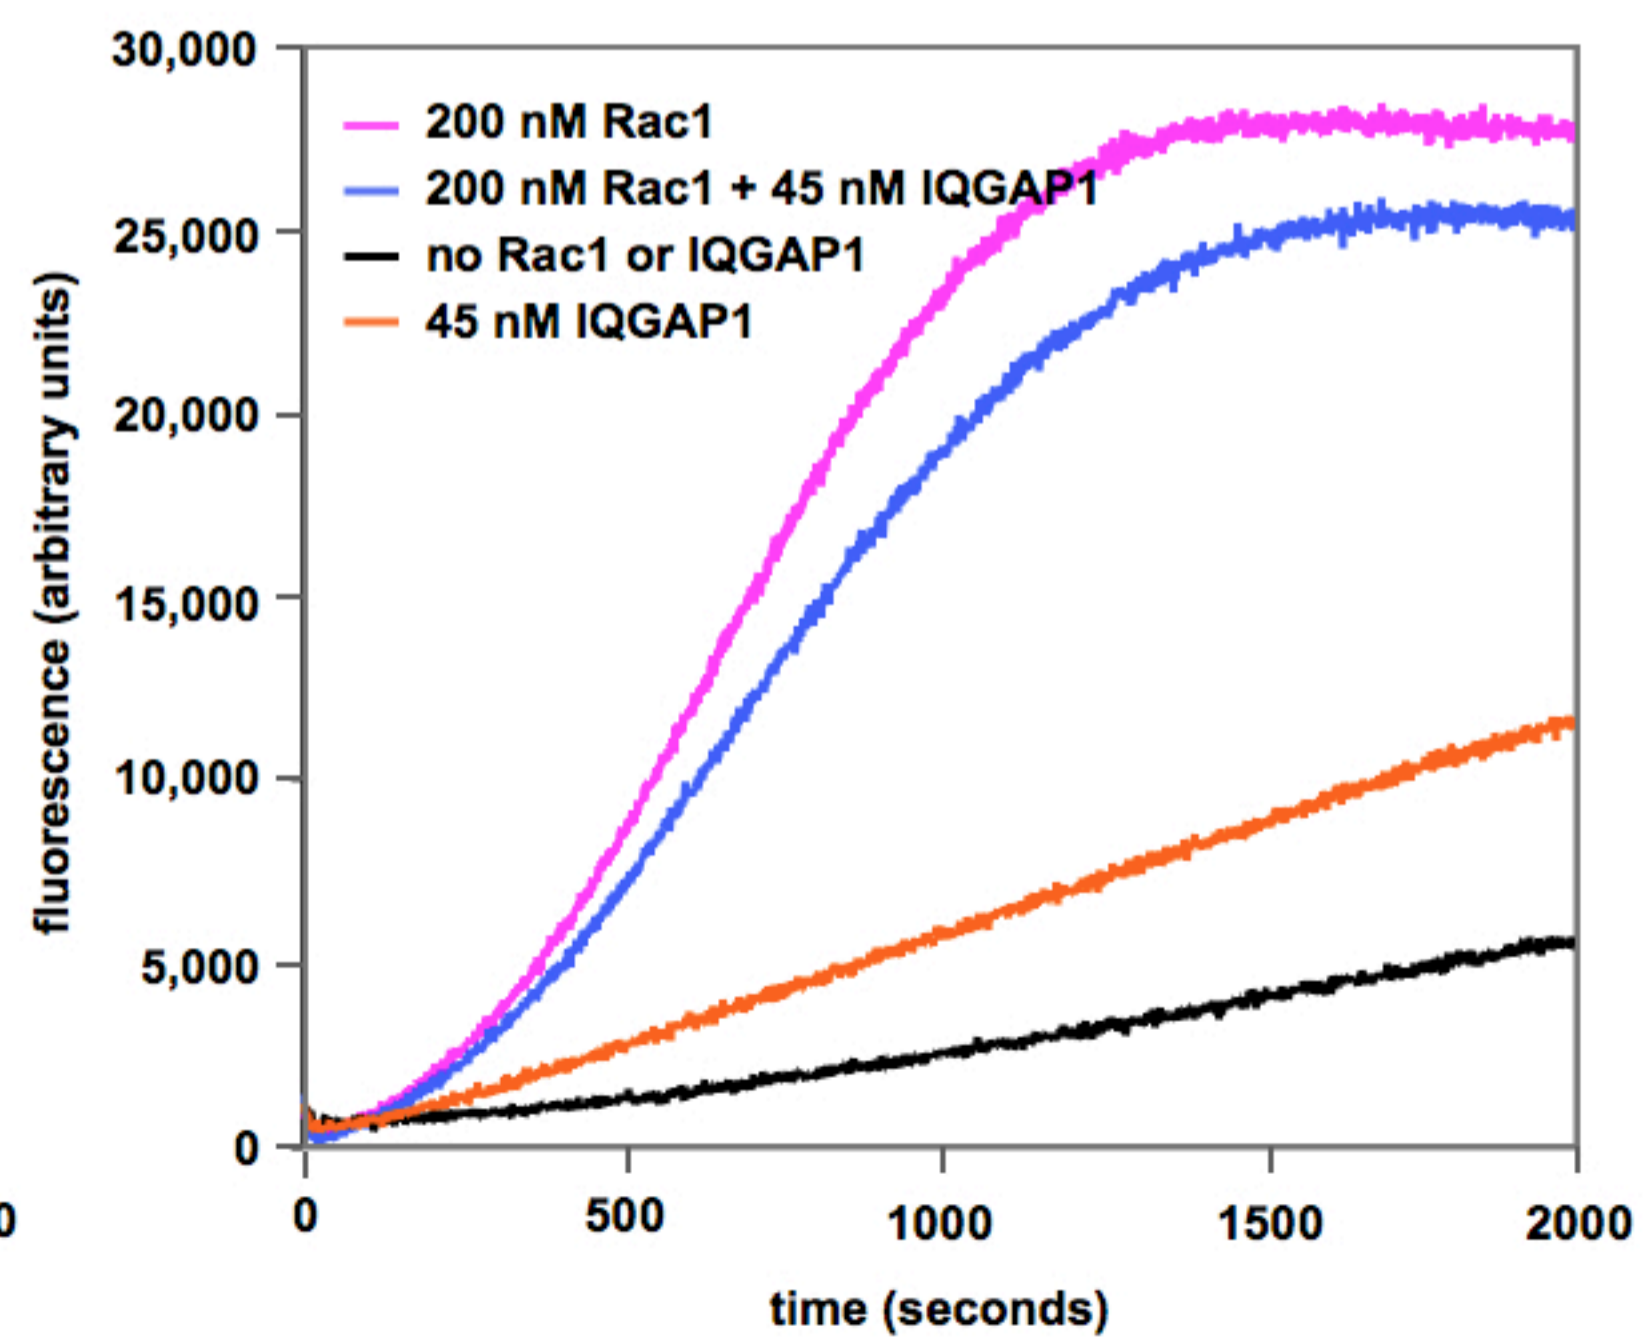



**A**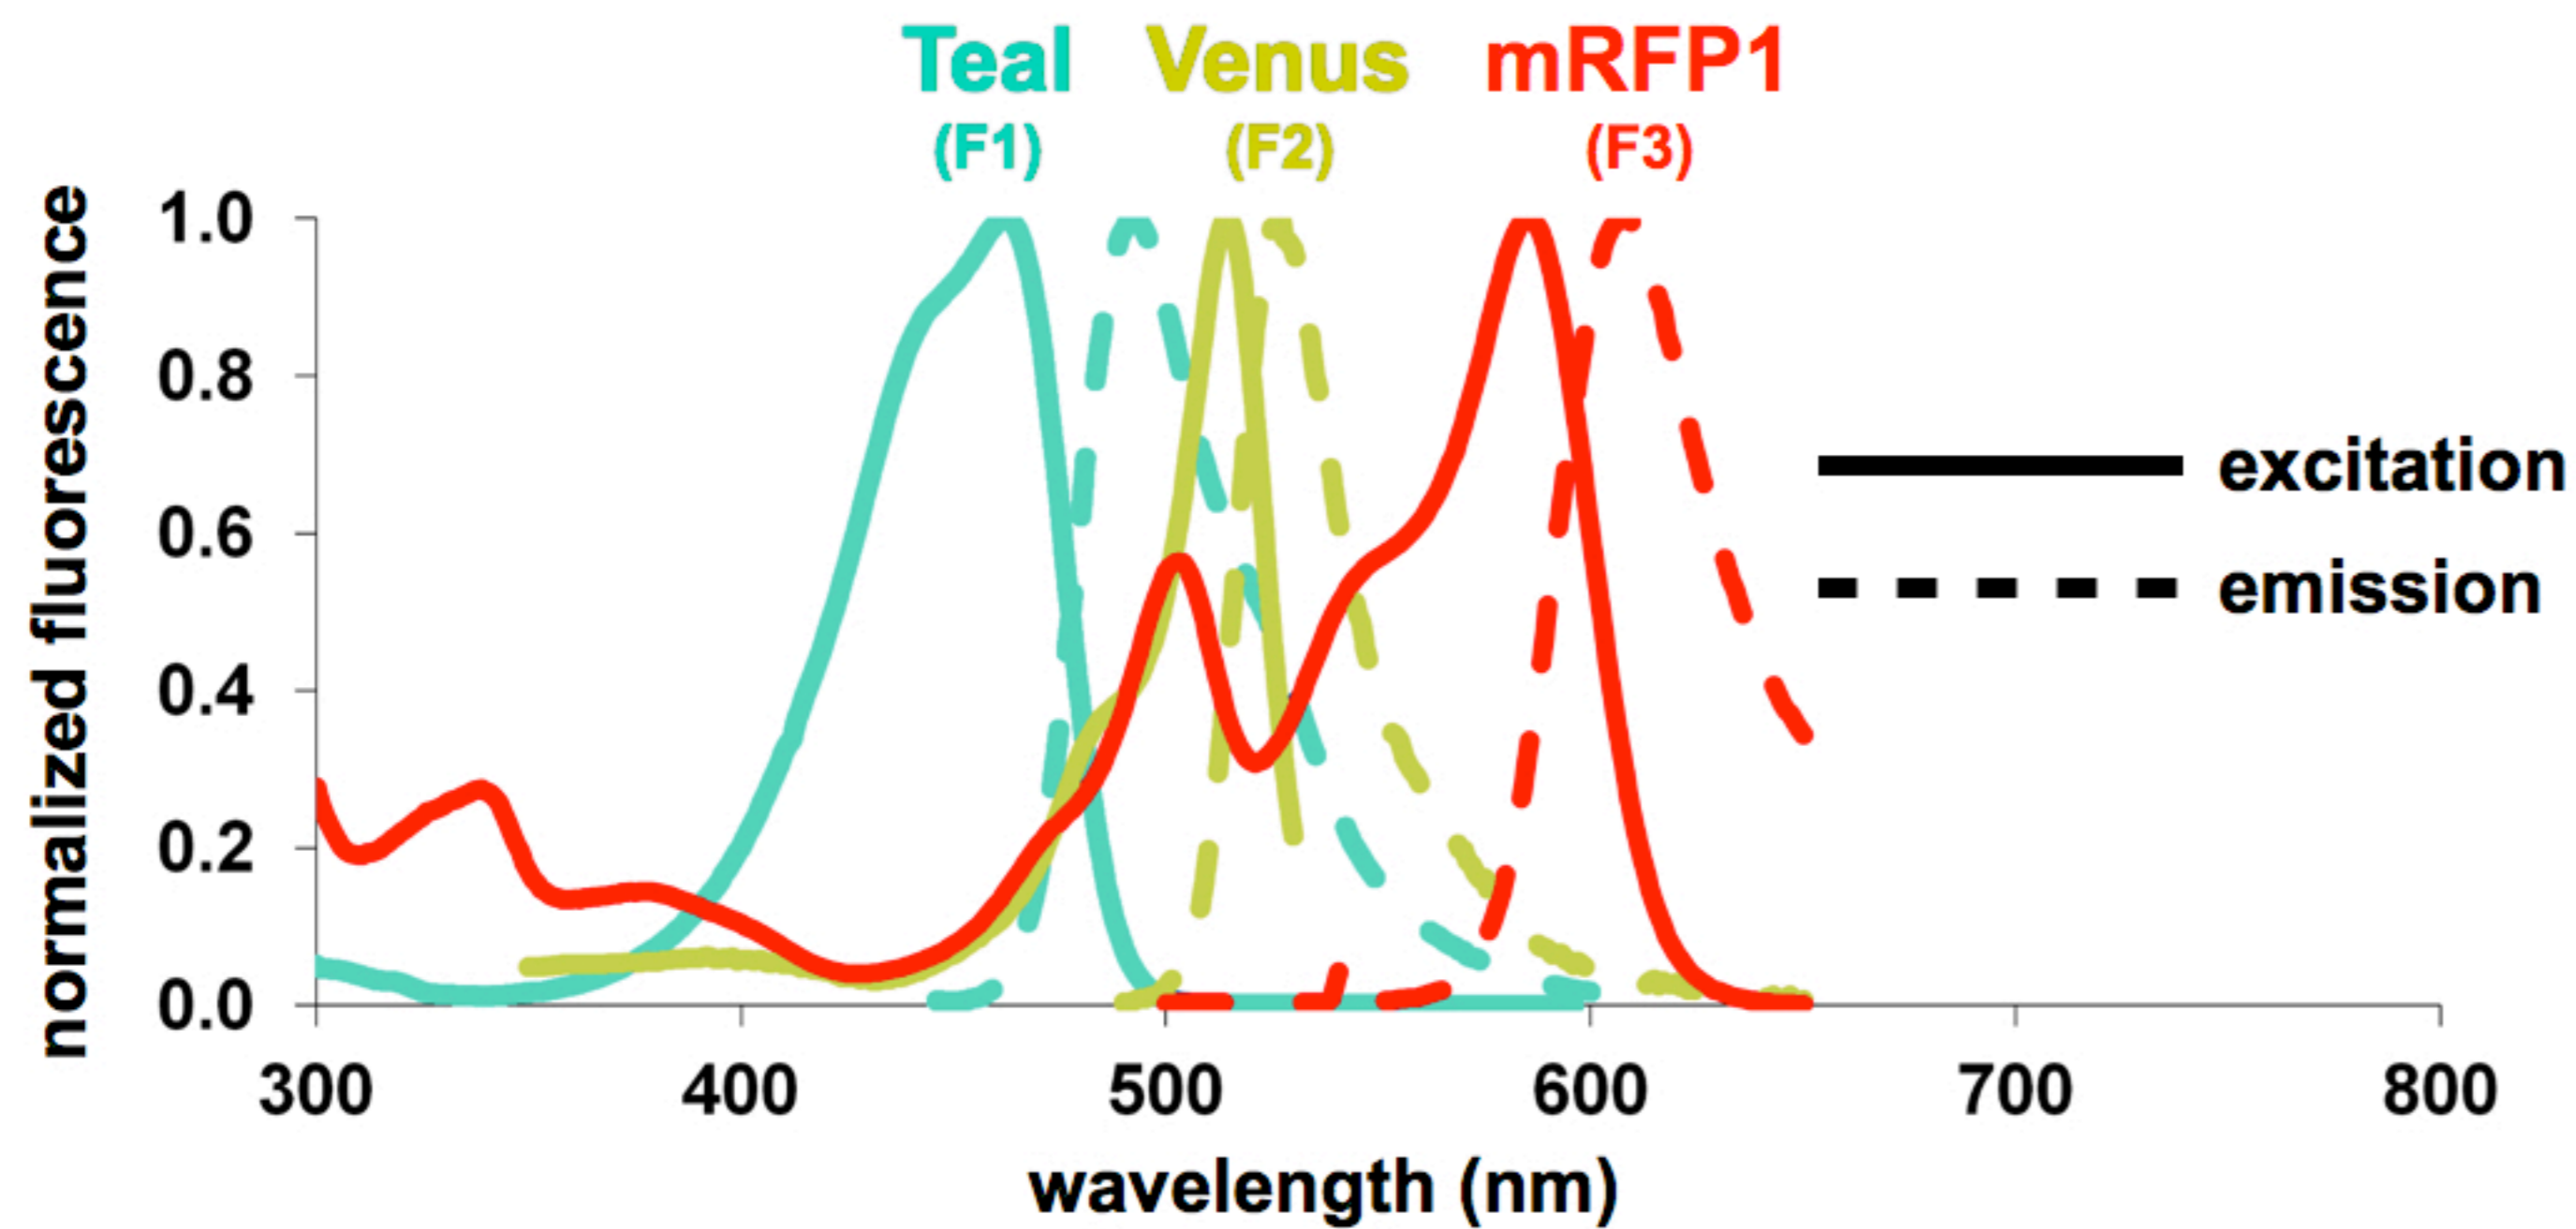**B**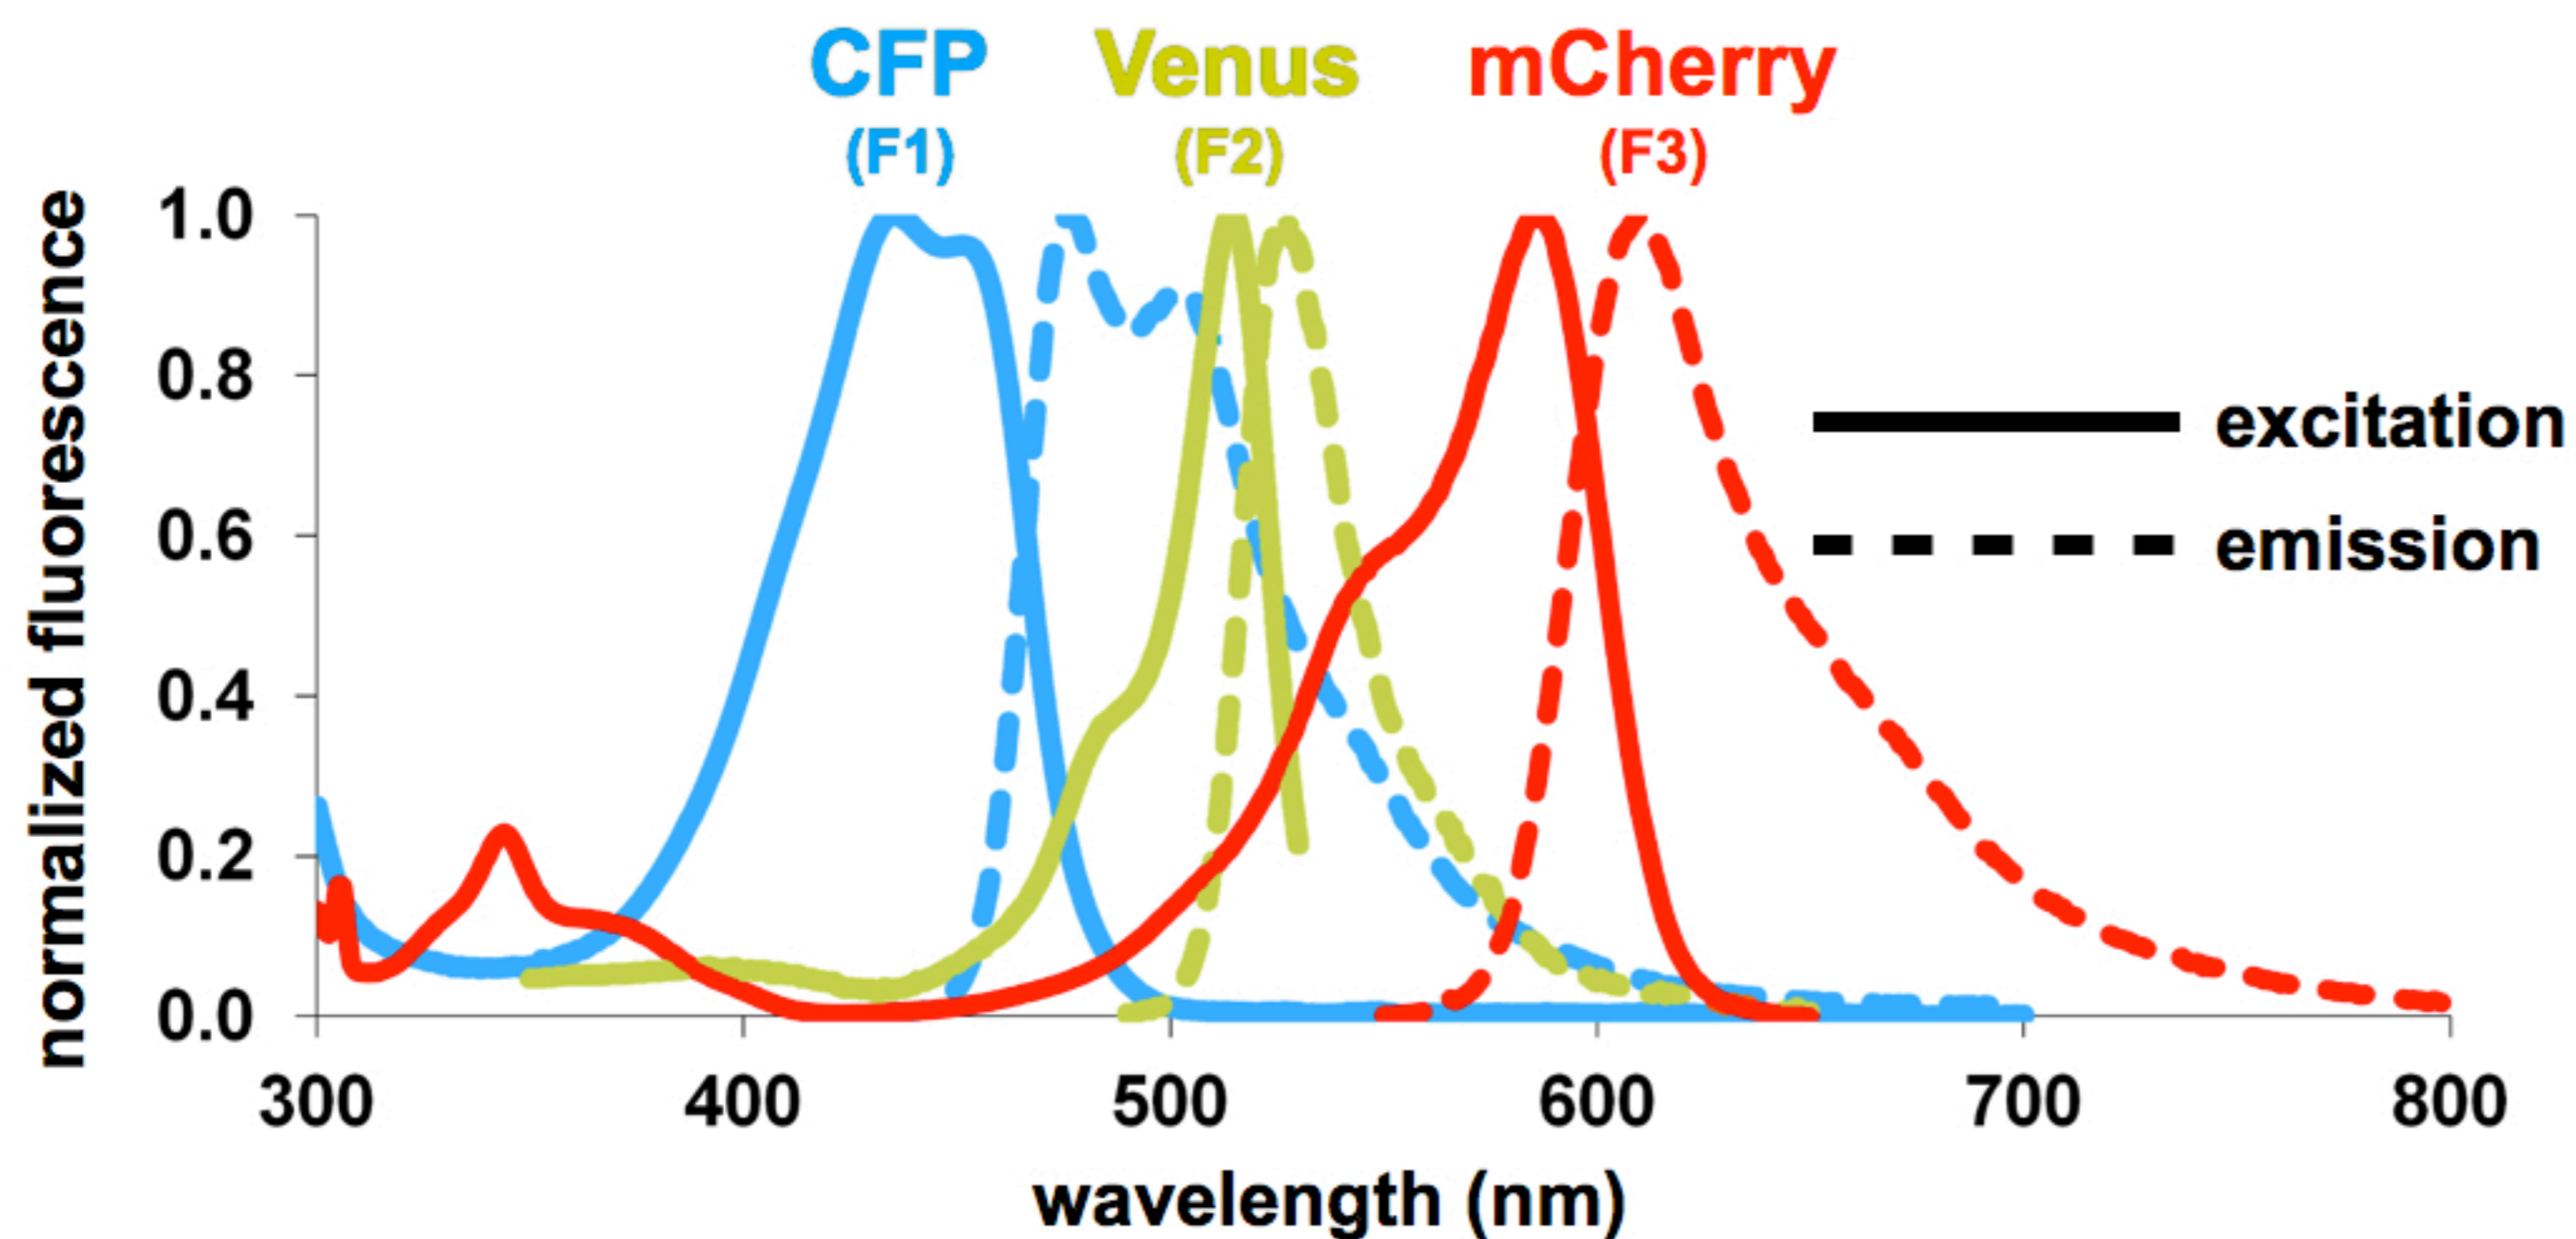**C**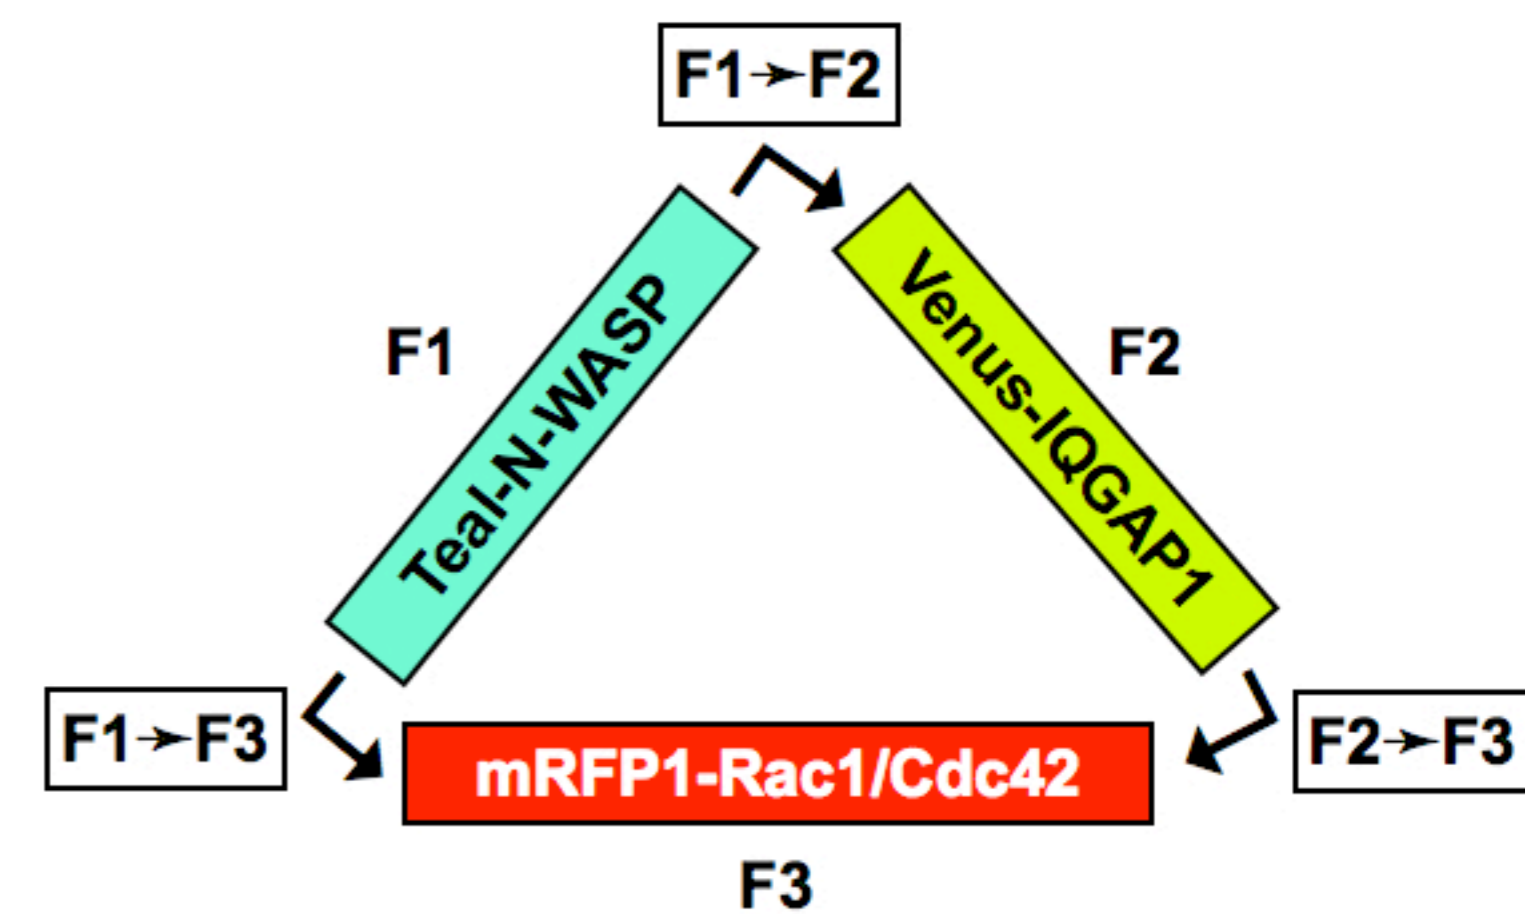**D**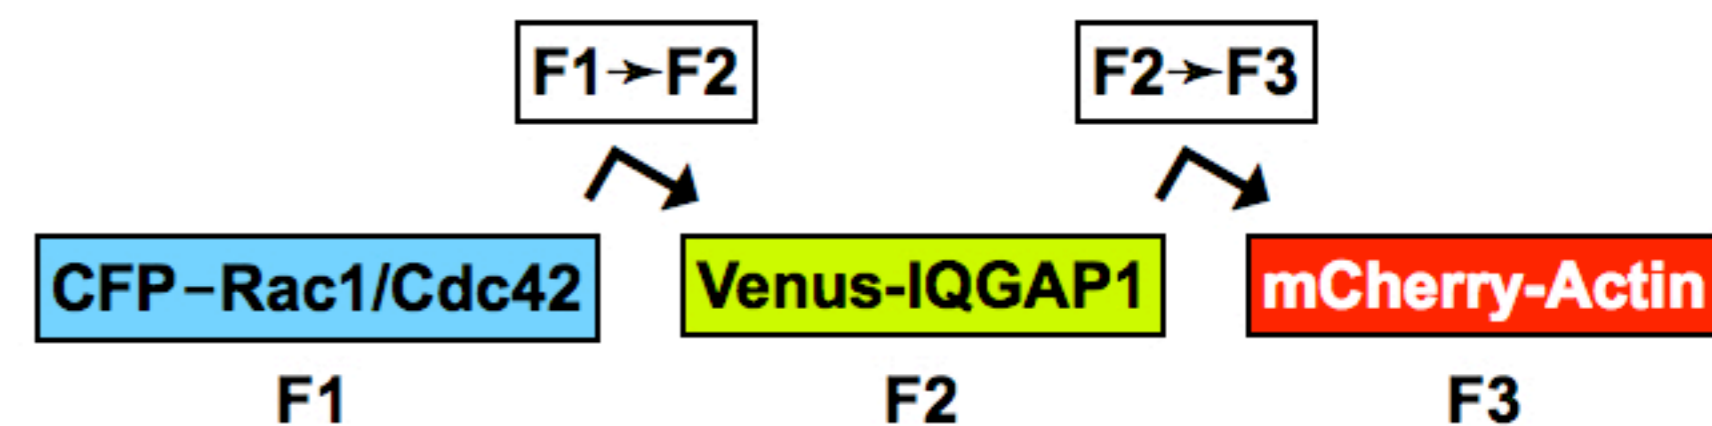

Supplement: NIHMS551034-supplement-Supp_Fig_S1-S4.pdf [file NIHMS551034-supplement-Supp_Fig_S1-S4.pdf]
